# Supplementary material for: Synthesis and Identification of Novel Berberine Derivatives as Potent Inhibitors against TNF-α-Induced NF-κB Activation
Source: PubMed Central journal article supplement (PMC6152030; doi:10.3390/molecules22081257), 2017-07-27

## Supporting Information

*Article*

# Synthesis and Identification of Novel Berberine Derivatives as Potent Inhibitors against TNF- $\alpha$ -induced NF- $\kappa$ B Activation

Yan-Xiang Wang, Lu Liu, Qing-Xuan Zeng, Tian-Yun Fan, Jian-Dong Jiang, Hong-Bin Deng and Dan-Qing Song

Table of Contents

$^1\text{H-NMR}$  and  $^{13}\text{C-NMR}$  spectrums of the representatives **2e**, **2g** and **2i** ..... 2-4

BRUKER AV-III-500 <sup>1</sup>H-NMR **2e** IN DMSO

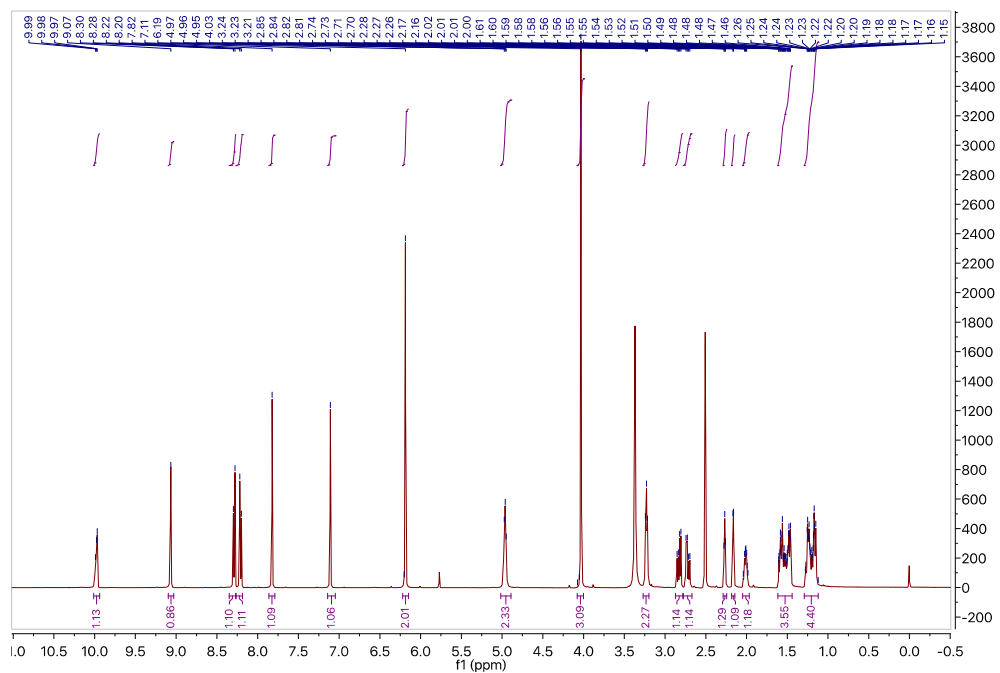

BRUKER AV-III-500 <sup>13</sup>C-NMR **2e** IN DMSO

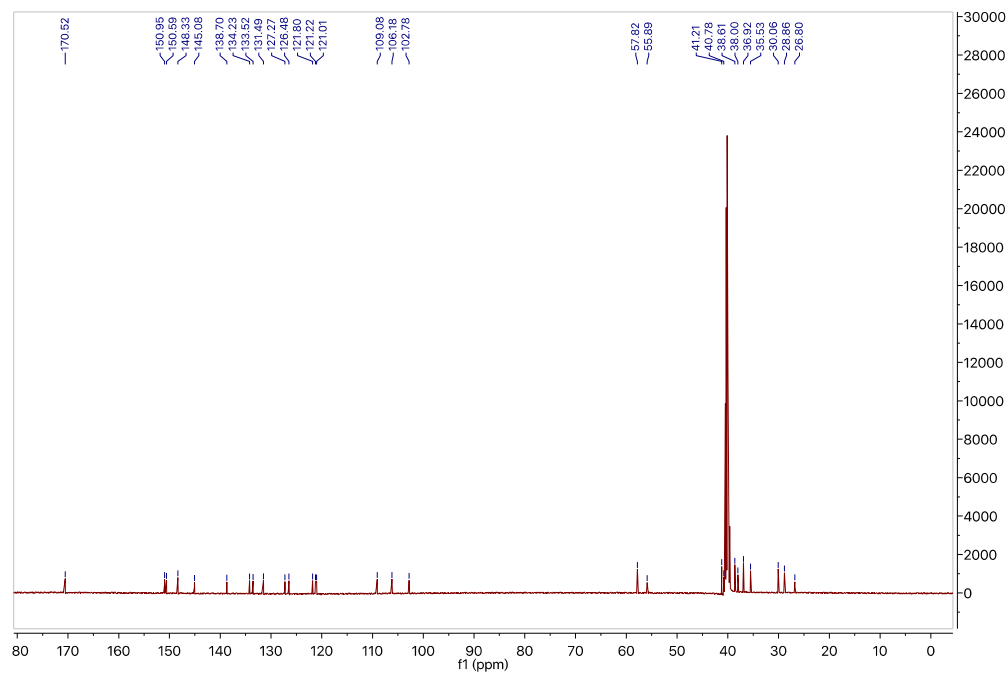

BRUKER AV-III-500 <sup>1</sup>H-NMR 2g IN DMSO

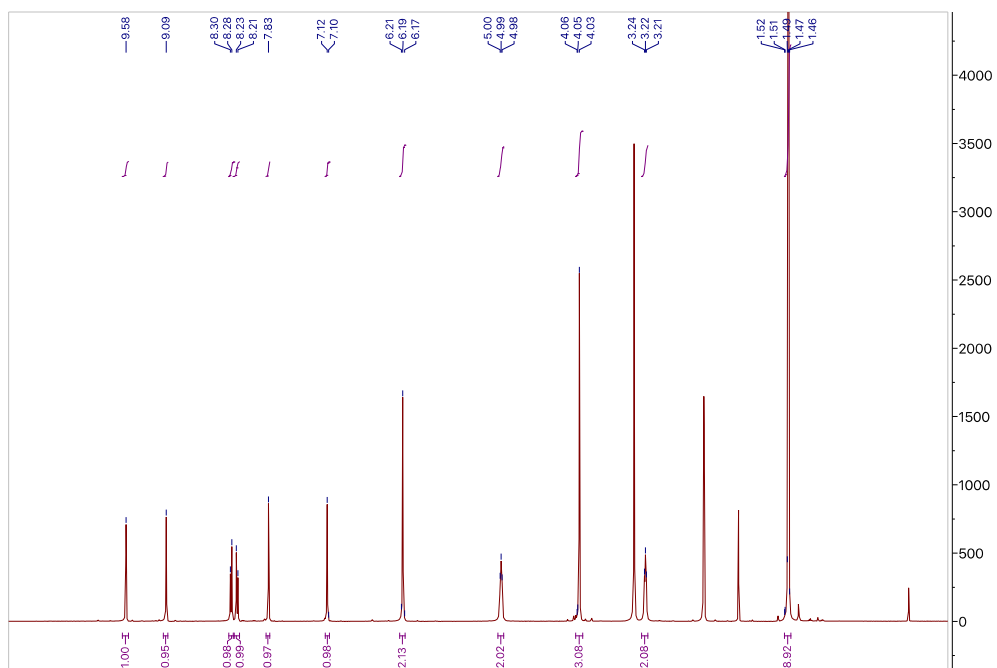

VNS-600 CARBON 2g IN CD<sub>3</sub>OD

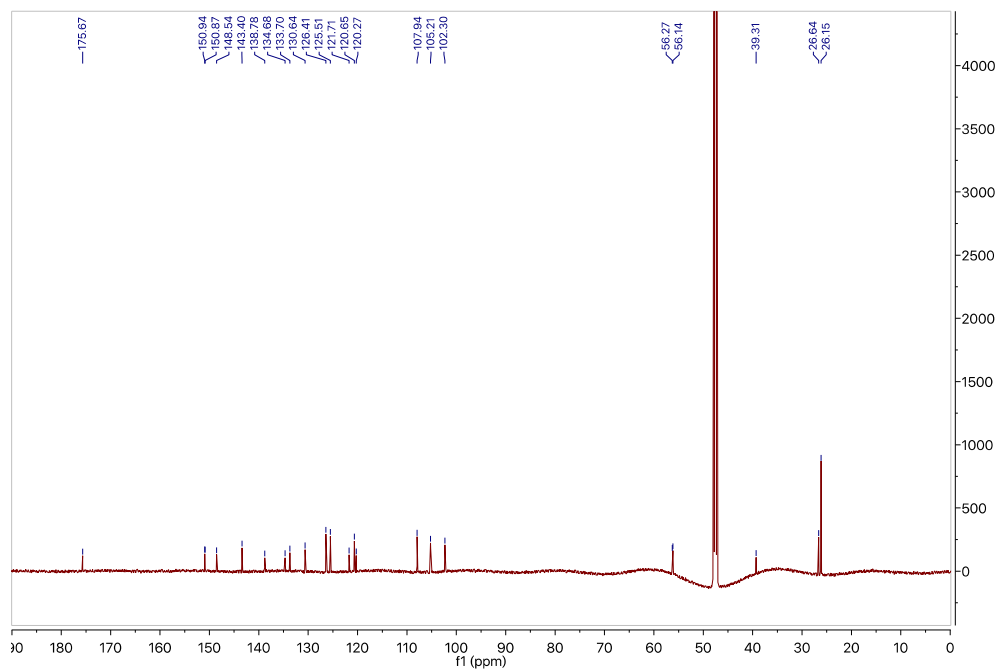

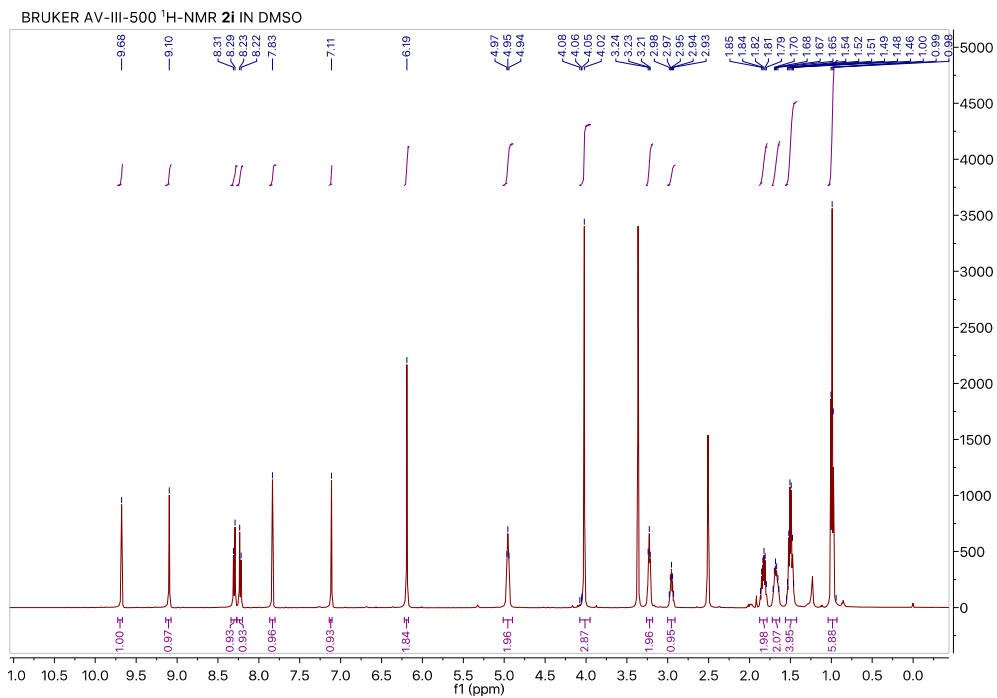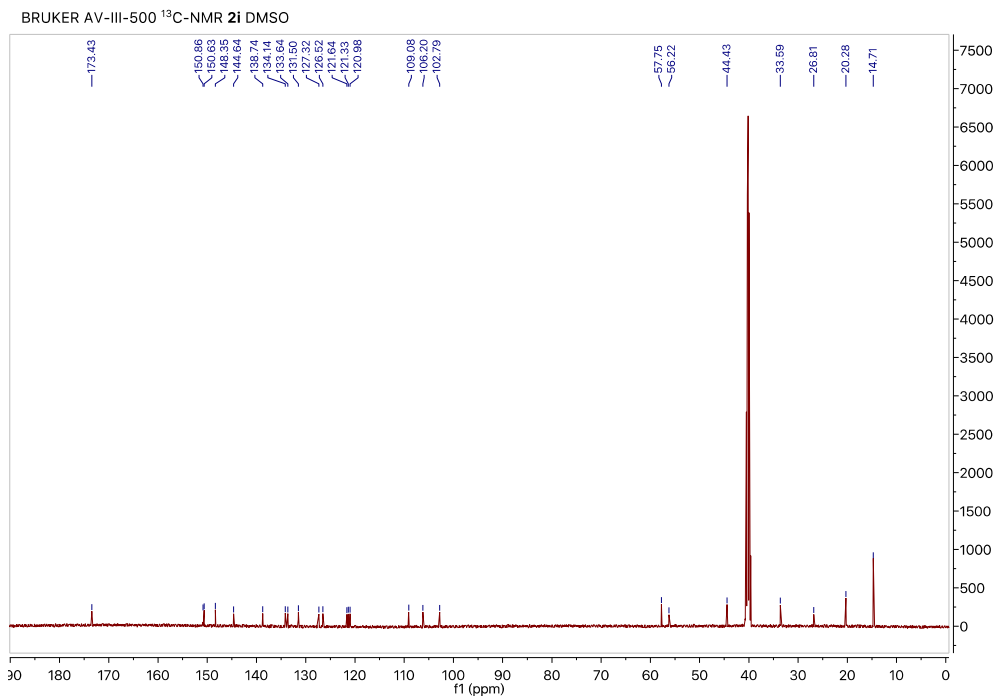

Supplement: molecules-22-01257-s001.pdf [file molecules-22-01257-s001.pdf]
